# Supplementary material for: Ultrafast melting and recovery of collective order in the excitonic insulator Ta2NiSe5
Source: PubMed Central journal article supplement (PMC7966769; doi:10.1038/s41467-021-21929-3), 2021-03-16
Supplement: 41467_2021_21929_MOESM2_ESM.pdf [file 41467_2021_21929_MOESM2_ESM.pdf]

**Editorial Note:** This manuscript has been previously reviewed at another journal that is not operating a transparent peer review scheme. The manuscript was considered suitable for publication without further review at *Nature Communications*.
